# Supplementary material for: Dynamics of greenhouse gases (CO 2 , CH 4 , N 2 O) along the Zambezi River and major tributaries, and their importance in the riverine carbon budget
Source: Copernicus journal article supplement (doi:10.5194/bg-12-2431-2015), 2015-04-24
Supplement: Supplementary file 1 [file bg-12-2431-2015-supplement.zip]

Table S4: Overview of TA, DIC,  $\delta^{13}\text{C}_{\text{DIC}}$ , major elements (Ca, Mg, DSi),  $\text{pCO}_2$ ,  $\text{CH}_4$  and  $\text{N}_2\text{O}$  concentrations,  $\text{CO}_2$  and  $\text{CH}_4$  fluxes and K600 for the different sampling sites during the wet season sampling campaign of 2012.

| River                   | Station ID | TA<br>[mmol L <sup>-1</sup> ] | DIC<br>[mmol L <sup>-1</sup> ] | $\delta^{13}\text{C}_{\text{DIC}}$<br>[‰] | Ca    | Mg<br>[μM] | DSi   | $\text{pCO}_2$<br>[ppm] | $\text{CH}_4$<br>[nmol L <sup>-1</sup> ] | $\text{N}_2\text{O}$ | $\text{CO}_2$ flux<br>[mg C m <sup>-2</sup> d <sup>-1</sup> ] | $\text{CH}_4$ flux | K600<br>[cm h <sup>-1</sup> ] |
|-------------------------|------------|-------------------------------|--------------------------------|-------------------------------------------|-------|------------|-------|-------------------------|------------------------------------------|----------------------|---------------------------------------------------------------|--------------------|-------------------------------|
| <b>Zambezi mainstem</b> |            |                               |                                |                                           |       |            |       |                         |                                          |                      |                                                               |                    |                               |
| Zambezi River           | ZBZ.1      | 0.140                         | 0.198                          | -13.8                                     | 28.3  | 25.5       | 139.9 | 1056                    | 457                                      | 6.9                  | 1534                                                          |                    | 5.2                           |
| Zambezi River           | ZBZ.2      | 0.128                         | 0.209                          | -12.9                                     | 31.7  | 16.6       | 113.5 | 2444                    | 149                                      | 6.4                  | 1592                                                          |                    | 1.7                           |
| Zambezi River           | ZBZ.3      | 0.836                         | 0.881                          | -11.6                                     | 253.0 | 130.3      | 173.8 | 1968                    | 342                                      | 6.2                  | 3286                                                          |                    | 4.6                           |
| Zambezi River           | ZBZ.4      |                               |                                |                                           |       |            |       |                         |                                          |                      |                                                               |                    |                               |
| Zambezi River           | ZBZ.5      | 0.573                         | 0.706                          | -8.5                                      | 172.3 | 83.9       | 208.6 | 7650                    | 1020                                     | 4.1                  | 12511                                                         |                    | 3.8                           |
| Zambezi River           | ZBZ.6      | 0.608                         | 0.677                          | -6.9                                      | 189.9 | 84.6       | 240.0 | 1890                    | 447                                      | 6.2                  | 553                                                           |                    | 0.8                           |
| Zambezi River           | ZBZ.7      | 0.656                         | 0.854                          | -7.0                                      | 202.5 | 92.2       | 252.0 | 6307                    | 2336                                     | 5.0                  | 3094                                                          |                    | 1.1                           |
| Zambezi River           | ZBZ.8      | 0.676                         | 0.764                          | -6.2                                      | 198.4 | 95.5       | 259.9 | 2500                    | 224                                      | 5.8                  | 1434                                                          |                    | 1.5                           |
| Zambezi River           | ZBZ.9      | 0.666                         | 0.683                          | -5.0                                      | 189.8 | 93.8       | 258.6 | 642                     | 7                                        | 6.3                  | 281                                                           |                    | 2.9                           |
| Zambezi River           | ZBZ.10     |                               |                                |                                           |       |            |       |                         |                                          |                      |                                                               |                    |                               |
| Zambezi River           | ZBZ.11     | 0.849                         | 0.929                          | -7.0                                      | 233.8 | 112.7      | 187.2 | 2008                    | 240                                      | 8.5                  | 2823                                                          |                    | 3.9                           |
| Zambezi River           | ZBZ.12     | 1.171                         | 1.202                          | -6.6                                      | 315.9 | 192.8      | 215.2 | 1228                    | 144                                      | 6.9                  | 1289                                                          |                    | 3.5                           |
| Zambezi River           | ZBZ.13     | 1.096                         | 1.105                          | -5.8                                      | 311.4 | 164.1      | 212.7 | 888                     | 354                                      | 5.9                  | 256                                                           |                    | 1.3                           |
| Zambezi River           | ZBZ.14     | 1.15                          | 1.191                          | -4.35                                     | 311.1 | 175.1      | 234.6 | 1802                    | 370                                      | 8.0                  | 1502                                                          |                    | 2.3                           |
| Zambezi River           | ZBZ.15     | 1.16                          | 1.172                          | -3.90                                     | 313.1 | 168.8      | 229.4 | 814                     | 243                                      | 8.1                  | 198                                                           |                    | 1.1                           |
| Zambezi River           | ZBZ.16     | 1.16                          | 1.157                          | -3.69                                     | 310.4 | 169.0      | 232.9 | 559                     | 136                                      | 7.9                  | 281                                                           |                    | 4.5                           |
| Zambezi River           | ZBZ.17     | 1.19                          | 1.214                          | -3.54                                     | 319.9 | 171.5      | 231.3 | 1204                    | 2394                                     | 7.7                  | 540                                                           |                    | 1.5                           |
| Zambezi River           | ZBZ.18     | 1.95                          | 2.249                          | -3.28                                     | 394.0 | 267.4      | 185.2 | 8181                    | 1350                                     | 5.3                  | 13384                                                         |                    | 3.8                           |
| Zambezi River           | ZBZ.19     | 1.37                          | 1.403                          | -3.17                                     | 339.3 | 195.0      | 223.3 | 1789                    | 687                                      | 7.6                  | 11150                                                         |                    |                               |
| Zambezi River           | ZBZ.20     | 1.41                          | 1.444                          | -3.12                                     | 343.3 | 201.2      | 217.7 | 1612                    | 313                                      | 7.9                  | 3343                                                          |                    | 6.1                           |
| <b>Tributaries</b>      |            |                               |                                |                                           |       |            |       |                         |                                          |                      |                                                               |                    |                               |
| Kafue River             | KAF.1      | 0.93                          | 1.027                          | -8.10                                     | 281.5 | 211.9      | 158.6 | 3945                    | 263                                      | 6.1                  |                                                               |                    |                               |
| Kafue River             | KAF.2      | 0.84                          | 0.910                          | -8.29                                     | 332.4 | 206.9      | 166.3 | 2806                    | 224                                      | 6.7                  | 8688                                                          |                    | 7.9                           |
| Kafue River             | KAF.3      | 1.15                          | 1.179                          | -6.34                                     | 509.0 | 337.1      | 191.8 | 1830                    | 367                                      | 5.8                  | 2218                                                          |                    | 3.4                           |
| Kafue River             | KAF.4      | 1.35                          | 1.430                          | -4.62                                     | 481.6 | 322.0      | 207.4 | 3972                    | 327                                      | 5.0                  | 3062                                                          |                    | 1.9                           |
| Kafue River             | KAF.5      | 1.49                          | 1.531                          | -6.31                                     | 505.0 | 293.7      | 223.1 | 1858                    | 252                                      | 6.0                  | 440                                                           |                    | 0.7                           |
| Kafue River             | KAF.6      | 1.57                          | 1.572                          | -5.46                                     | 568.9 | 328.7      | 233.3 | 904                     | 30                                       | 6.4                  | 767                                                           |                    | 3.5                           |
| Kafue River             | KAF.7      | 1.61                          | 1.645                          | -5.19                                     | 569.6 | 349.5      | 231.5 | 1620                    | 735                                      | 6.1                  | 339                                                           |                    | 0.6                           |
| Kafue River             | KAF.8      | 1.90                          | 2.081                          | -5.80                                     | 591.6 | 367.9      | 321.1 | 9985                    | 992                                      | 3.9                  | 2876                                                          |                    | 0.7                           |
| Kafue River             | KAF.9      | 2.00                          | 2.214                          | -6.17                                     | 634.3 | 369.0      | 325.3 | 9769                    | 651                                      | 6.1                  | 2845                                                          |                    | 0.7                           |
| Kafue River             | KAF.10     | 1.98                          | 1.987                          | -5.39                                     | 610.8 | 374.3      | 313.2 | 1357                    | 207                                      | 7.0                  | 884                                                           |                    | 2.1                           |
| Kabompo River           | KAB.1      | 0.235                         | 0.295                          | -11.5                                     | 53.1  | 31.2       | 187.2 |                         | 246                                      | 7.0                  |                                                               |                    |                               |

|                   |         |       |       |        |       |       |       |       |     |     |       |     |
|-------------------|---------|-------|-------|--------|-------|-------|-------|-------|-----|-----|-------|-----|
| Kabompo River     | KAB.2   |       |       |        |       |       |       |       |     |     |       |     |
| Luangwa River     | LUA.1   |       |       |        |       |       |       |       |     |     |       |     |
| Luangwa River     | LUA.2   | 1.15  | 1.168 | -8.37  | 261.7 | 139.2 | 321.2 | 1305  | 286 | 7.9 |       |     |
| Luangwa River     | LUA.3   | 1.03  | 1.047 | -8.42  | 238.1 | 108.1 | 284.7 | 1227  | 277 | 7.8 | 863   | 2.4 |
| Luangwa River     | LUA.4   | 0.771 | 0.810 | -10.4  | 156.1 | 85.7  | 265.7 | 1469  | 166 | 6.5 | 867   | 1.8 |
| Luangwa River     | LUA.5   | 0.90  | 0.917 | -8.10  | 222.5 | 100.3 | 289.7 | 1201  | 127 | 7.9 |       |     |
| Lunsewma River    | LUNSE.1 | 0.72  | 0.796 | -8.13  | 151.4 | 127.0 | 226.6 | 2952  | 422 | 7.6 | 3193  | 2.7 |
| Lunsewma River    | LUNSE.2 | 0.84  | 0.874 | -7.00  | 189.9 | 140.7 | 240.3 | 1523  | 373 | 8.3 | 3140  | 6.2 |
| Lunga River       | LUN.1   | 1.72  | 1.821 | -10.28 | 433.9 | 379.3 | 221.1 | 2621  | 541 | 6.5 | 5098  | 4.9 |
| Lunga River       | LUN.2   | 1.89  | 2.045 | -8.64  | 618.0 | 303.2 | 223.3 | 4465  | 414 | 5.3 | 2037  | 1.1 |
| Lunga River       | LUN.3   | 1.88  | 1.937 | -9.12  | 571.1 | 324.2 | 244.6 | 2460  | 307 | 6.1 | 3483  | 3.7 |
| Mazoe River       | MAZ.    |       |       |        |       |       |       |       |     |     |       |     |
| Shire River       | SH.     | 2.19  | 2.576 | -3.37  | 416.2 | 294.5 | 172.3 | 12698 | 849 | 3.4 | 20536 | 3.6 |
| <b>Reservoirs</b> |         |       |       |        |       |       |       |       |     |     |       |     |
| Kariba            | KAR.1   | 0.871 | 0.865 | -3.5   | 242.7 | 119.2 | 198.7 |       | 202 | 6.4 | -248  | 1.3 |
| Kariba            | KAR.2   | 0.855 | 0.451 | -3.6   | 197.6 | 80.7  | 182.2 | 356   | 212 | 6.1 | -68   | 1.9 |
| Kariba            | KAR.3   | 0.835 | 0.825 | -3.2   | 239.7 | 116.2 | 194.8 | 370   | 34  | 6.5 | -70   | 2.7 |
| Cabora Bassa      | C.B.1   | 1.12  | 1.095 | -2.67  | 315.4 | 168.7 | 210.2 | 168   | 78  | 8.0 | -377  | 3.2 |
| Cabora Bassa      | C.B.2   | 1.13  | 1.146 | -4.15  | 315.1 | 162.4 | 217.4 | 342   | 29  | 8.4 |       |     |
| Cabora Bassa      | C.B.3   |       |       |        |       |       |       |       |     |     |       |     |
| Itezhi Tezhi      | ITT.1   | 1.40  | 1.429 | -5.79  | 491.0 | 278.3 | 235.5 | 1813  | 37  | 6.7 | 644   | 1.0 |
| Itezhi Tezhi      | ITT.2   | 1.50  | 1.498 | -4.93  | 538.7 | 307.8 | 233.3 | 842   | 61  | 6.7 | 420   | 2.3 |
| Itezhi Tezhi      | ITT.3   | 1.62  | 1.610 | -4.40  | 562.4 | 357.4 | 226.1 | 735   | 89  | 6.8 | 266   | 1.9 |
