# Supplementary material for: Dynamics of greenhouse gases (CO 2 , CH 4 , N 2 O) along the Zambezi River and major tributaries, and their importance in the riverine carbon budget
Source: Copernicus journal article supplement (doi:10.5194/bg-12-2431-2015), 2015-04-24
Supplement: Supplementary file 2 [file bg-12-2431-2015-supplement.zip]

Table S3: Overview of temperature (T), specific conductance (SpC), dissolved oxygen (DO), pH, community respiration (R) and primary production (P) for the different sampling sites during the dry season sampling campaign of 2013. SD represent standard deviation.

| River                   | Station ID | Date      | Lat.     | Long.   | Altitude | Distance from source | Catchment area     | T    | SpC                    | DO    | pH    | R±SD                                    | P±SD       |
|-------------------------|------------|-----------|----------|---------|----------|----------------------|--------------------|------|------------------------|-------|-------|-----------------------------------------|------------|
|                         |            |           | [DD]     |         | [m]      | [km]                 | [km <sup>2</sup> ] | [°C] | [μS cm <sup>-1</sup> ] | [%]   | [NBS] | [μmol L <sup>-1</sup> h <sup>-1</sup> ] |            |
| <b>Zambezi mainstem</b> |            |           |          |         |          |                      |                    |      |                        |       |       |                                         |            |
| Zambezi River           | ZBZ.1      | 19-Oct-13 | -11.3503 | 24.3286 | 1442     | 3                    | 25                 | 18.8 | 5.4                    | 84.2  | 6.14  | 0.27±0.03                               | 0.2±0.0    |
| Zambezi River           | ZBZ.2      | 20-Oct-13 | -13.0974 | 22.6854 | 1043     | 575                  | 80346              | 27.0 | 32.6                   | 104.0 | 6.06  | 0.40±0.05                               | 35.1±3.9   |
| Zambezi River           | ZBZ.3      | 21-Oct-13 | -14.3838 | 23.2362 | 1028     | 773                  | 213627             | 26.2 | 164.8                  | 97.5  | 7.94  | 0.74±0.04                               | 30.8±0.4   |
| Zambezi River           | ZBZ.4      | 23-Oct-13 | -15.2060 | 22.9223 | 1014     | 893                  | 281007             | 26.1 |                        | 99.0  | 7.41  | 0.67±0.03                               |            |
| Zambezi River           | ZBZ.5      | 22-Oct-13 | -16.1300 | 23.2883 | 1005     | 1085                 | 309896             | 26.5 | 106.9                  | 101.7 | 7.39  | 0.97±0.10                               | 66.1±3.4   |
| Zambezi River           | ZBZ.6      | 24-Oct-13 | -17.4667 | 24.2469 | 939      | 1280                 | 336405             | 26.1 | 110.9                  | 104.0 | 7.72  | 0.95±0.06                               | 32.6±0.7   |
| Zambezi River           | ZBZ.8      | 25-Oct-13 | -17.8874 | 25.8426 | 889      | 1511                 | 520912             | 25.9 | 111.4                  | 101.1 | 7.71  | 0.68±0.03                               | 33.4±0.1   |
| Zambezi River           | ZBZ.10     | 29-Oct-13 | -16.5043 | 28.7907 | 400      | 1944                 | 678810             | 24.3 | 88.4                   | 70.5  | 6.56  |                                         |            |
| Zambezi River           | ZBZ.11     | 27-Oct-13 | -15.9850 | 28.8808 | 371      | 2010                 | 682655             | 24.7 | 88.1                   | 86.2  | 6.78  | 0.50±0.08                               | 17.6±0.4   |
| Zambezi River           | ZBZ.13     | 10-Nov-13 | -15.6244 | 30.4135 | 327      | 2201                 | 857673             | 29.1 | 109.7                  | 106.5 | 7.96  | 0.85±0.03                               | 122.1±3.2  |
| <b>Tributaries</b>      |            |           |          |         |          |                      |                    |      |                        |       |       |                                         |            |
| Kafue River             | KAF.1      | 14-Nov-13 | -12.4643 | 27.8507 | 1258     | 159                  | 5569               | 27.3 | 602.2                  | 87.2  | 7.84  | 1.27±0.17                               | 104.8±48.0 |
| Kafue River             | KAF.4      | 15-Nov-13 | -14.5624 | 26.4576 | 1100     | 743                  | 55017              | 29.7 | 536.0                  | 143.0 | 8.54  | 1.52±0.17                               | 21.8±0.7   |
| Kafue River             | KAF.5      | 16-Nov-13 | -14.9778 | 25.9926 | 1075     | 882                  | 95590              | 28.3 | 413.1                  | 96.3  | 8.12  | 1.06±0.13                               | 35.8±1.2   |
| Kafue River             | KAF.6      | 17-Nov-13 | -15.7638 | 26.0303 | 998      | 1009                 | 106434             | 23.9 | 228.2                  | 116.6 | 7.82  | 1.69±0.23                               | 21.6±0.9   |
| Kafue River             | KAF.8      | 20-Nov-13 | -15.7479 | 27.8283 | 982      | 1317                 | 148151             | 27.2 | 249.7                  | 49.0  | 7.12  | 1.09±0.14                               | 60.5±1.2   |
| Kafue River             | KAF.9      | 21-Nov-13 | -15.8365 | 28.2376 | 979      | 1430                 | 151896             | 26.7 | 248.0                  | 43.9  | 7.10  | 1.07±0.11                               | 94.6±8.9   |
| Kafue River             | KAF.10     | 24-Nov-13 | -15.9512 | 28.8602 | 375      | 1521                 | 155774             | 27.6 | 246.8                  | 107.9 | 8.06  | 1.15±0.25                               | 76.1±2.5   |
| <b>Reservoirs</b>       |            |           |          |         |          |                      |                    |      |                        |       |       |                                         |            |
| Kariba                  | KAR.3      | 29-Oct-13 | -16.5755 | 28.6887 | 488      | 1928                 | 678367             | 27.6 | 91.0                   | 112.5 | 7.93  | 1.17±0.36                               | 8.8±2.5    |
| Itezhi Tezhi            | ITT.2      | 18-Nov-13 | -15.7741 | 25.9692 | 1030     | 1004                 | 104450             | 28.6 | 223.7                  | 121.3 | 8.51  | 1.43±0.08                               | 25.1±0.7   |
