# Supplementary material for: Dynamics of greenhouse gases (CO 2 , CH 4 , N 2 O) along the Zambezi River and major tributaries, and their importance in the riverine carbon budget
Source: Copernicus journal article supplement (doi:10.5194/bg-12-2431-2015), 2015-04-24
Supplement: Supplementary file 3 [file bg-12-2431-2015-supplement.zip]

Table S6: Overview of TA, DIC,  $\delta^{13}\text{C}_{\text{DIC}}$ , major elements (Ca, Mg, DSi),  $\text{pCO}_2$ ,  $\text{CH}_4$  and  $\text{N}_2\text{O}$  concentrations,  $\text{CO}_2$  and  $\text{CH}_4$  fluxes and K600 for the different sampling sites during the dry season sampling campaign of 2013.

| River                   | Station ID | TA<br>[mmol L <sup>-1</sup> ] | DIC<br>[mmol L <sup>-1</sup> ] | $\delta^{13}\text{C}_{\text{DIC}}$<br>[‰] | Ca   | Mg<br>[μM] | DSi | $\text{pCO}_2$<br>[ppm] | $\text{CH}_4$<br>[nmol L <sup>-1</sup> ] | $\text{N}_2\text{O}$ | $\text{CO}_2$ flux<br>[mg C m <sup>-2</sup> d <sup>-1</sup> ] | $\text{CH}_4$ flux | K600<br>[cm h <sup>-1</sup> ] |
|-------------------------|------------|-------------------------------|--------------------------------|-------------------------------------------|------|------------|-----|-------------------------|------------------------------------------|----------------------|---------------------------------------------------------------|--------------------|-------------------------------|
| <b>Zambezi mainstem</b> |            |                               |                                |                                           |      |            |     |                         |                                          |                      |                                                               |                    |                               |
| Zambezi River           | ZBZ.1      | 0.148                         | 0.052                          | -21.9                                     | 8.6  | 5.6        | 137 | 2555                    | 636                                      | 9.3                  | 222                                                           |                    | 0.2                           |
| Zambezi River           | ZBZ.2      | 0.863                         | 0.295                          | -9.5                                      | 79   | 41         | 165 | 617                     | 79                                       | 8.1                  |                                                               |                    |                               |
| Zambezi River           | ZBZ.3      | 1.598                         | 1.566                          | -9.8                                      | 436  | 288        | 215 | 681                     | 259                                      | 8.1                  | 269                                                           | 68.5               | 2.8                           |
| Zambezi River           | ZBZ.4      | 1.042                         | 0.962                          | -9.2                                      | 261  | 167        | 211 |                         | 454                                      | 8.1                  |                                                               |                    |                               |
| Zambezi River           | ZBZ.5      | 1.075                         | 0.988                          | -7.8                                      | 270  | 171        | 211 | 816                     | 873                                      | 8.1                  | 355                                                           | 100.1              | 2.4                           |
| Zambezi River           | ZBZ.6      | 1.050                         | 1.010                          | -7.5                                      | 274  | 177        | 203 | 300                     | 265                                      | 8.8                  | -23                                                           | 5.5                | 0.4                           |
| Zambezi River           | ZBZ.8      | 1.043                         | 1.003                          | -5.9                                      | 121  | 59         | 173 | 707                     | 300                                      | 8.1                  | 168                                                           | 12.7               | 1.6                           |
| Zambezi River           | ZBZ.10     | 1.329                         | 0.816                          | -7.1                                      | 224  | 116        | 174 | 2600                    | 25                                       | 11.4                 |                                                               |                    |                               |
| Zambezi River           | ZBZ.11     | 1.119                         | 0.813                          | -6.4                                      | 220  | 113        | 163 | 1602                    | 311                                      | 9.9                  | 3402                                                          | 349.5              | 6.9                           |
| Zambezi River           | ZBZ.13     | 0.996                         | 0.979                          | -5.1                                      | 287  | 156        | 176 | 462                     | 403                                      | 7.8                  | -33                                                           | 19.9               |                               |
| <b>Tributaries</b>      |            |                               |                                |                                           |      |            |     |                         |                                          |                      |                                                               |                    |                               |
| Kafue River             | KAF.1      | 3.043                         | 2.960                          | -10.7                                     | 1860 | 1035       | 308 | 2529                    | 261                                      | 10.3                 |                                                               |                    |                               |
| Kafue River             | KAF.4      | 2.409                         | 2.441                          | -6.9                                      | 1360 | 1247       | 282 | 331                     | 190                                      | 7.2                  |                                                               |                    |                               |
| Kafue River             | KAF.5      | 3.162                         | 3.134                          | -7.9                                      | 999  | 916        | 213 | 1705                    | 656                                      | 7.6                  | 251                                                           | 4.5                | 0.5                           |
| Kafue River             | KAF.6      | 1.939                         | 1.881                          | -5.7                                      | 628  | 421        | 162 | 1022                    | 92                                       | 9.5                  | 566                                                           | 19.6               | 2.3                           |
| Kafue River             | KAF.8      | 2.439                         | 2.094                          | -6.3                                      | 668  | 444        | 205 | 6049                    | 539                                      | 7.0                  | 10870                                                         | 57.2               | 4.9                           |
| Kafue River             | KAF.9      | 2.464                         | 2.102                          | -6.6                                      | 628  | 416        | 194 | 6647                    | 898                                      | 8.3                  | 4195                                                          | 14.7               | 1.7                           |
| Kafue River             | KAF.10     | 2.125                         | 2.099                          | -5.8                                      | 661  | 437        | 201 | 1099                    | 274                                      | 8.7                  | 807                                                           | 651.7              | 3.1                           |
| <b>Reservoirs</b>       |            |                               |                                |                                           |      |            |     |                         |                                          |                      |                                                               |                    |                               |
| Kariba Res.             | KAR.3      | 0.843                         | 0.827                          | -3.5                                      | 227  | 116        | 176 | 156                     | 19                                       | 8.6                  | -277                                                          | 14.1               | 2.6                           |
| Itezhi Tezhi Res.       | ITT.2      | 1.800                         | 1.822                          | -3.0                                      | 598  | 394        | 160 | 165                     | 71                                       | 7.8                  | -418                                                          | 97.0               | 4.0                           |
