# Supplementary material for: Dynamics of greenhouse gases (CO 2 , CH 4 , N 2 O) along the Zambezi River and major tributaries, and their importance in the riverine carbon budget
Source: Copernicus journal article supplement (doi:10.5194/bg-12-2431-2015), 2015-04-24
Supplement: Supplementary file 5 [file bg-12-2431-2015-supplement.zip]

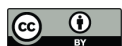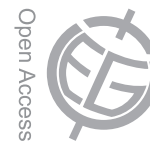

## *Supplement of*

# **Dynamics of greenhouse gases (CO<sub>2</sub>, CH<sub>4</sub>, N<sub>2</sub>O) along the Zambezi River and major tributaries, and their importance in the riverine carbon budget**

**C. R. Teodoru et al.**

*Correspondence to:* C. R. Teodoru (teo.teodoru@ees.kuleuven.be)

- bg-12-2431-2015-supplement-cover-letter.pdf
- Tables\_PDF
  - Table S1.pdf
  - Table S2.pdf
  - Table S3.pdf
  - Table S4.pdf
  - Table S5.pdf
  - Table S6.pdf
