# Supplementary material for: Dynamics of greenhouse gases (CO 2 , CH 4 , N 2 O) along the Zambezi River and major tributaries, and their importance in the riverine carbon budget
Source: Copernicus journal article supplement (doi:10.5194/bg-12-2431-2015), 2015-04-24
Supplement: Supplementary file 6 [file bg-12-2431-2015-supplement.zip]

Table S2: Overview of temperature (T), specific conductivity (SpC), dissolved oxygen (DO), pH, community respiration (R) and primary production (P) for the different sampling sites during the wet season sampling campaign of 2013. SD represent standard deviation.

| River                   | Station ID | Date      | Lat.     | Long.   | Altitude | Distance from source | Catchment area     | T    | SpC                    | DO    | pH    | R±SD                                    | P±SD      |
|-------------------------|------------|-----------|----------|---------|----------|----------------------|--------------------|------|------------------------|-------|-------|-----------------------------------------|-----------|
|                         |            |           | [DD]     |         | [m]      | [km]                 | [km <sup>2</sup> ] | [°C] | [μS cm <sup>-1</sup> ] | [%]   | [NBS] | [μmol L <sup>-1</sup> h <sup>-1</sup> ] |           |
| <b>Zambezi mainstem</b> |            |           |          |         |          |                      |                    |      |                        |       |       |                                         |           |
| Zambezi River           | ZBZ.1      | 13-Jan-13 | -11.1220 | 24.1986 | 1223     | 75                   | 729                | 22.5 | 19.5                   | 93.6  | 5.91  | 0.29±0.04                               | 0.8±0.1   |
| Zambezi River           | ZBZ.2      | 14-Jan-13 | -13.1077 | 22.6890 | 1043     | 575                  | 80346              | 26.5 | 10.8                   | 90.5  | 5.54  | 0.46±0.02                               | 8.2±1.2   |
| Zambezi River           | ZBZ.3      | 16-Jan-13 | -14.3372 | 23.2359 | 1028     | 773                  | 213627             | 26.2 | 94.3                   | 85.9  |       | 0.58±0.09                               | 17.7±0.9  |
| Zambezi River           | ZBZ.5      | 17-Jan-13 | -16.2447 | 23.2388 | 1005     | 1085                 | 309896             | 25.7 |                        | 31.9  |       | 1.5±0.06                                |           |
| Zambezi River           | ZBZ.6      | 18-Jan-13 | -17.4666 | 24.2470 | 939      | 1280                 | 336405             | 26.8 | 72.0                   | 93.7  |       | 0.79±0.11                               | 66.6±0.4  |
| Zambezi River           | ZBZ.7      | 19-Jan-13 | -17.7985 | 25.2807 | 924      | 1437                 | 517757             | 26.8 | 77.4                   | 63.5  |       | 0.67±0.07                               | 62.4±1.7  |
| Zambezi River           | ZBZ.8      | 21-Jan-13 | -17.8874 | 25.8426 | 889      | 1511                 | 520912             | 27.5 | 78.2                   | 94.9  |       | 0.78±0.04                               |           |
| Zambezi River           | ZBZ.9      | 21-Jan-13 | -17.9311 | 25.8596 | 773      | 1518                 | 521391             | 27.5 |                        |       |       |                                         |           |
| Zambezi River           | ZBZ.11     | 25-Jan-13 | -16.0162 | 28.8798 | 371      | 2010                 | 682655             | 26.6 | 85.1                   | 75.9  | 7.42  |                                         | 15.7±0.5  |
| Zambezi River           | ZBZ.13     | 29-Jan-13 | -15.6355 | 30.4034 | 327      | 2201                 | 857673             | 29.9 | 122.1                  | 96.8  | 7.76  |                                         | 68.6±2.6  |
| Zambezi River           | ZBZ.15     | 22-Feb-13 | -16.1396 | 33.5408 | 124      | 2591                 | 1106186            | 27.3 | 119.5                  | 107.1 | 7.99  | 1.01±0.07                               | 23.6±2.0  |
| Zambezi River           | ZBZ.17     | 24-Feb-13 | -17.4594 | 35.0592 | 40       | 2841                 | 1203346            | 30.7 | 135.6                  | 81.5  | 7.53  | 0.76±0.07                               | 34.9±2.1  |
| Zambezi River           | ZBZ.18     | 25-Feb-13 | -17.8059 | 35.3995 | 25       | 2912                 | 1368613            | 30.3 | 179.5                  | 9.0   | 7.02  | 0.96±0.21                               | 85.3±2.4  |
| Zambezi River           | ZBZ.19     | 2-Mar-13  | -18.5792 | 36.2442 | 2        | 3050                 | 1379213            | 30.0 | 144.5                  | 72.3  | 7.31  | 0.52±0.04                               | 38.2±1.3  |
| Zambezi River           | ZBZ.20     | 1-Mar-13  | -18.5673 | 36.4453 | 0        | 3083                 | 1379423            | 30.2 | 150.8                  | 70.8  | 7.37  | 0.87±0.12                               | 39.8±7.9  |
| <b>Tributaries</b>      |            |           |          |         |          |                      |                    |      |                        |       |       |                                         |           |
| Kafue River             | KAF.1      | 8-Feb-13  | -12.4643 | 27.8508 | 1258     | 159                  | 5569               | 26.4 | 157.7                  | 73.1  | 7.45  | 0.43±0.04                               | 25.8±16.3 |
| Kafue River             | KAF.2      | 7-Feb-13  | -12.6450 | 28.1645 | 1190     | 230                  | 7012               | 26.9 | 178.8                  | 101.2 | 7.58  | 0.33±0.07                               | 13.8±2.7  |
| Kafue River             | KAF.3      | 3-Feb-13  | -13.6423 | 27.7616 | 1129     | 492                  | 22927              | 25.8 | 220.4                  | 81.0  | 7.42  | 1.38±0.20                               | 35.1±1.9  |
| Kafue River             | KAF.4      | 10-Feb-13 | -14.5625 | 26.4577 | 1100     | 743                  | 55017              | 26.6 | 167.4                  | 77.3  | 7.18  | 0.61±0.04                               | 23.5±0.7  |
| Kafue River             | KAF.5      | 11-Feb-13 | -14.9449 | 25.9130 | 1075     | 882                  | 95590              | 26.4 | 142.5                  | 94.3  | 7.62  | 0.33±0.04                               | 59.9±11.6 |
| Kafue River             | KAF.6      | 13-Feb-13 | -15.7641 | 26.0304 | 998      | 1009                 | 106434             | 25.8 | 160.4                  | 130.0 | 8.06  | 1.55±0.19                               | 24.8±0.6  |
| Kafue River             | KAF.8      | 15-Feb-13 | -15.7465 | 27.8296 | 982      | 1317                 | 148151             | 26.4 | 189.0                  | 18.8  | 7.07  | 0.81±0.15                               | 35.6±8.8  |
| Kafue River             | KAF.9      | 16-Feb-13 | -15.8369 | 28.3282 | 979      | 1430                 | 151896             | 26.2 | 194.2                  | 17.0  | 7.16  | 0.63±0.06                               | 29.0±1.9  |
| Kafue River             | KAF.10     | 17-Feb-13 | -15.9462 | 28.8720 | 375      | 1521                 | 155774             | 27.3 | 194.5                  | 106.5 | 8.20  | 0.74±0.06                               | 41.6±22.6 |
| Kabompo River           | KAB.1      | 12-Jan-13 | -11.8886 | 25.2505 | 1317     | 59                   | 1083               | 21.3 | 37.5                   | 99.3  | 6.76  | 0.52±0.10                               |           |

|                   |         |           |          |         |      |      |         |      |       |       |      |           |           |
|-------------------|---------|-----------|----------|---------|------|------|---------|------|-------|-------|------|-----------|-----------|
| Kabompo River     | KAB.2   | 15-Jan-13 | -14.0387 | 23.6290 | 1045 | 699  | 66513   | 25.1 | 165.4 | 85.8  | 7.48 | 0.43±0.04 | 15.9±1.2  |
| Luangwa River     | LUA.1   | 11-Mar-13 | -10.2520 | 33.0221 | 778  | 104  | 3456    | 24.6 | 57.2  | 99.5  | 7.40 | 0.99±0.25 | 15.3±0.4  |
| Luangwa River     | LUA.2   | 27-Jan-13 | -13.0979 | 31.7860 | 529  | 692  | 74498   | 28.4 | 172.5 | 94.4  | 8.01 | 1.49±0.17 | 22.0±4.6  |
| Luangwa River     | LUA.4   | 28-Jan-13 | -15.0055 | 30.2155 | 369  | 1048 | 142795  | 29.5 | 90.4  | 98.6  | 7.63 | 0.88±0.04 | 10.2±1.7  |
| Luangwa River     | LUA.5   | 29-Jan-13 | -15.6040 | 30.4103 | 327  | 1139 | 149697  | 30.3 | 100.2 | 101.7 | 7.71 | 0.57±0.05 | 13.6±3.5  |
| Lunsewmfa River   | LUNSE.1 | 2-Feb-13  | -13.9320 | 29.1316 | 1064 | 217  | 5612    | 23.9 | 67.5  | 94.6  | 7.45 | 0.74±0.05 | 2.4±0.8   |
| Lunsewmfa River   | LUNSE.2 | 30-Jan-13 | -14.7943 | 29.6292 | 440  | 393  | 25698   | 27.6 | 93.0  | 94.2  | 7.50 | 0.33±0.05 | 32.1±1.4  |
| Lunga River       | LUN.1   | 9-Feb-13  | -12.2604 | 26.7923 | 1271 | 50   | 591     | 21.2 | 130.5 | 86.2  | 7.63 | 0.52±0.06 | 2.7±1.2   |
| Lunga River       | LUN.3   | 10-Feb-13 | -13.9839 | 26.3469 | 1121 | 471  | 21530   | 24.9 | 162.2 | 81.0  | 7.75 | 0.48±0.02 | 12.6±0.6  |
| Mazoe River       | MAZ.    | 6-Mar-13  | -16.5435 | 33.3806 | 169  | 348  | 33934   | 28.9 | 104.9 | 104.2 | 8.04 | 0.49±0.05 | 91.7±78.3 |
| Shire River       | SH.     | 26-Feb-13 | -17.4584 | 35.3388 | 30   | 370  | 161885  | 29.7 | 174.5 | 6.3   | 6.87 | 0.93±0.04 | 75.2±5.1  |
| <b>Reservoirs</b> |         |           |          |         |      |      |         |      |       |       |      |           |           |
| Kariba            | KAR.2   | 22-Jan-13 | -17.2790 | 27.5348 | 488  | 1779 | 597346  | 30.7 | 82.8  | 106.8 |      | 0.47±0.11 | 9.6±0.3   |
| Kariba            | KAR.3   | 24-Jan-13 | -16.5543 | 28.6837 | 488  | 1928 | 678367  | 28.1 | 94.9  | 101.0 | 8.47 | 0.77±0.11 | 23.6±0.3  |
| Cabora Bassa      | C.B.2   | 21-Feb-13 | -15.5874 | 32.3754 | 317  | 2420 | 1065594 | 31.6 | 112.7 | 122.9 | 8.98 | 1.47±0.06 | 22.6±3.5  |
| Cabora Bassa      | C.B.3   | 20-Feb-13 | -15.5567 | 32.6337 | 317  | 2449 | 1067073 | 30.6 | 112.7 | 125.5 | 9.07 | 0.96±0.20 | 26.6±1.8  |
| Itezhi Tezhi      | ITT.1   | 12-Feb-13 | -15.6103 | 26.0147 | 1030 | 988  | 103613  | 25.9 | 151.6 | 89.6  | 7.79 | 0.37±0.10 | 54.3±19.5 |
| Itezhi Tezhi      | ITT.2   | 12-Feb-13 | -15.7602 | 25.9888 | 1030 | 1004 | 104450  | 27.2 | 153.3 | 94.8  | 7.89 | 0.44±0.03 | 23.3±0.5  |
| Itezhi Tezhi      | ITT.3   | 13-Feb-13 | -15.8125 | 25.9389 | 1030 | 1011 | 106424  | 25.9 |       | 90.6  | 8.30 | 0.42±0.20 | 69.0±4.1  |
