# Supplementary material for: Dynamics of greenhouse gases (CO 2 , CH 4 , N 2 O) along the Zambezi River and major tributaries, and their importance in the riverine carbon budget
Source: Copernicus journal article supplement (doi:10.5194/bg-12-2431-2015), 2015-04-24
Supplement: Supplementary file 7 [file bg-12-2431-2015-supplement.zip]

Table S5: Overview of TA, DIC,  $\delta^{13}\text{C}_{\text{DIC}}$ , major elements (Ca, Mg, DSi),  $\text{pCO}_2$ ,  $\text{CH}_4$  and  $\text{N}_2\text{O}$  concentrations,  $\text{CO}_2$  and  $\text{CH}_4$  fluxes and K600 for the different sampling sites during the wet season sampling campaign of 2013.

| River                   | Station ID | TA<br>[mmol L <sup>-1</sup> ] | DIC   | $\delta^{13}\text{C}_{\text{DIC}}$<br>[‰] | Ca  | Mg<br>[μM] | DSi | $\text{pCO}_2$<br>[ppm] | $\text{CH}_4$<br>[nmol L <sup>-1</sup> ] | $\text{N}_2\text{O}$ | $\text{CO}_2$ flux<br>[mg C m <sup>-2</sup> d <sup>-1</sup> ] | $\text{CH}_4$ flux | K600<br>[cm h <sup>-1</sup> ] |
|-------------------------|------------|-------------------------------|-------|-------------------------------------------|-----|------------|-----|-------------------------|------------------------------------------|----------------------|---------------------------------------------------------------|--------------------|-------------------------------|
| <b>Zambezi mainstem</b> |            |                               |       |                                           |     |            |     |                         |                                          |                      |                                                               |                    |                               |
| Zambezi River           | ZBZ.1      | 0.212                         | 0.820 | -13.3                                     | 42  | 40         | 150 | 2005                    | 612                                      | 7.0                  | 645                                                           | 9.2                | 0.9                           |
| Zambezi River           | ZBZ.2      | 0.101                         | 0.762 | -13.0                                     | 27  | 13         | 82  | 2576                    | 134                                      | 6.2                  | 1202                                                          | 1.1                | 1.2                           |
| Zambezi River           | ZBZ.3      | 0.917                         |       | -11.4                                     | 255 | 149        | 185 | 2560                    | 274                                      | 6.9                  | 2278                                                          | 8.3                | 2.3                           |
| Zambezi River           | ZBZ.5      | 0.642                         |       | -6.1                                      | 172 | 91         | 224 | 10351                   | 12127                                    | 3.5                  |                                                               |                    |                               |
| Zambezi River           | ZBZ.6      | 0.653                         |       | -6.7                                      | 182 | 93         | 242 | 1555                    | 299                                      | 6.3                  | 278                                                           | 2.4                | 0.5                           |
| Zambezi River           | ZBZ.7      | 0.706                         |       | -7.4                                      | 190 | 100        | 240 | 4979                    | 987                                      | 5.6                  | 4672                                                          | 19.6               | 2.2                           |
| Zambezi River           | ZBZ.8      | 0.703                         |       | -6.4                                      | 194 | 105        | 242 | 1718                    | 198                                      | 6.2                  | 392                                                           | 1.7                | 0.7                           |
| Zambezi River           | ZBZ.11     | 0.811                         | 0.878 | -7.8                                      | 222 | 108        | 165 | 2207                    | 165                                      | 8.0                  | 1409                                                          | 5.1                | 1.7                           |
| Zambezi River           | ZBZ.13     | 1.132                         | 1.170 | -8.3                                      | 249 | 135        | 190 | 1447                    | 186                                      | 6.2                  | 1158                                                          | 12.1               | 2.4                           |
| Zambezi River           | ZBZ.15     | 1.216                         | 1.236 | -6.8                                      | 307 | 174        | 234 | 1272                    | 332                                      | 7.5                  | 1536                                                          | 22.7               | 3.9                           |
| Zambezi River           | ZBZ.17     | 1.332                         | 1.412 | -8.4                                      |     |            |     | 3615                    | 928                                      | 6.9                  | 5610                                                          | 77.4               | 3.8                           |
| Zambezi River           | ZBZ.18     | 1.638                         | 1.969 | -7.2                                      | 330 | 219        | 257 | 12199                   | 1769                                     | 2.5                  | 33292                                                         | 154.3              | 6.1                           |
| Zambezi River           | ZBZ.19     | 1.397                         | 1.540 | -7.5                                      | 322 | 190        | 263 | 4291                    | 149                                      | 6.5                  | 9179                                                          | 3.6                | 5.1                           |
| Zambezi River           | ZBZ.20     | 1.418                         | 1.544 | -7.5                                      | 331 | 197        | 262 | 4521                    | 67                                       | 6.3                  |                                                               |                    |                               |
| <b>Tributaries</b>      |            |                               |       |                                           |     |            |     |                         |                                          |                      |                                                               |                    |                               |
| Kafue River             | KAF.1      | 1.290                         | 1.388 | -9.0                                      | 436 | 294        | 194 | 4346                    | 302                                      | 5.9                  |                                                               |                    |                               |
| Kafue River             | KAF.2      | 1.157                         | 1.221 | -9.8                                      | 517 | 307        | 191 | 3093                    | 217                                      | 6.9                  | 1940                                                          | 5.8                | 1.6                           |
| Kafue River             | KAF.3      | 1.186                         | 1.284 | -10.8                                     |     |            |     | 3407                    | 264                                      | 6.5                  | 1950                                                          | 7.7                | 1.4                           |
| Kafue River             | KAF.4      | 1.197                         | 1.370 | -7.8                                      | 469 | 322        | 187 | 4136                    | 456                                      | 5.6                  | 1676                                                          | 4.6                | 1.0                           |
| Kafue River             | KAF.5      | 1.225                         | 1.287 | -8.7                                      | 424 | 260        | 196 | 2300                    | 196                                      | 5.9                  | 454                                                           | 2.4                | 0.5                           |
| Kafue River             | KAF.6      | 1.295                         | 1.312 | -7.5                                      | 449 | 294        | 190 | 1237                    | 100                                      | 6.8                  | 429                                                           | 0.8                | 1.1                           |
| Kafue River             | KAF.8      | 1.905                         | 2.261 | -8.6                                      | 559 | 349        | 364 | 11747                   | 524                                      | 3.0                  | 22799                                                         | 76.6               | 4.4                           |
| Kafue River             | KAF.9      | 1.942                         | 2.239 | -8.7                                      | 549 | 341        | 351 | 10915                   | 550                                      | 3.7                  | 12412                                                         | 18.9               | 2.6                           |
| Kafue River             | KAF.10     | 1.948                         | 1.958 | -7.9                                      | 565 | 345        | 351 | 1552                    | 352                                      | 6.8                  | 1178                                                          | 17.4               | 2.3                           |
| Kabompo River           | KAB.1      | 0.308                         | 0.434 | -10.6                                     | 74  | 39         | 221 | 1234                    | 284                                      | 7.2                  |                                                               |                    |                               |
| Kabompo River           | KAB.2      | 1.592                         | 1.708 | -10.1                                     | 454 | 270        | 269 | 2470                    | 165                                      | 6.9                  |                                                               |                    |                               |
| Luangwa River           | LUA.1      |                               |       | -9.6                                      |     |            |     | 1410                    | 213                                      | 7.5                  |                                                               |                    |                               |
| Luangwa River           | LUA.2      | 1.577                         | 1.601 | -10.7                                     | 345 | 219        | 258 | 1855                    | 139                                      | 6.7                  | 2641                                                          | 9.2                | 4.0                           |
| Luangwa River           | LUA.4      | 0.818                         | 0.857 | -10.3                                     | 196 | 100        | 244 | 1432                    | 298                                      | 6.8                  | 1601                                                          |                    | 3.4                           |
| Luangwa River           | LUA.5      | 0.890                         | 0.923 | -9.6                                      | 222 | 108        | 212 | 1317                    | 96                                       | 6.7                  | 1501                                                          | 6.5                | 3.6                           |
| Lunsewma River          | LUNSE.1    | 0.783                         | 0.845 | -10.8                                     | 163 | 164        | 200 | 2493                    | 725                                      | 6.8                  | 4902                                                          | 50.6               | 5.1                           |
| Lunsewma River          | LUNSE.2    | 0.867                         | 0.925 | -9.8                                      | 192 | 136        | 225 | 2154                    | 534                                      | 7.1                  | 1100                                                          | 10.0               | 1.4                           |

|                   |       |       |       |       |     |     |     |       |       |     |       |        |     |
|-------------------|-------|-------|-------|-------|-----|-----|-----|-------|-------|-----|-------|--------|-----|
| Lunga River       | LUN.1 | 1.477 | 1.556 | -11.1 | 342 | 325 | 198 | 3284  | 445   | 6.6 | 2837  | 14.8   | 2.1 |
| Lunga River       | LUN.3 | 1.772 | 1.837 | -9.7  | 531 | 288 | 208 | 2855  | 314   | 6.4 | 1691  |        | 1.5 |
| Mazoe River       | MAZ.  | 1.025 | 1.038 | -9.4  | 240 | 149 | 306 | 955   | 152   | 6.7 | 157   | 3.1    | 0.6 |
| Shire River       | SH.   | 1.597 | 2.054 | -6.8  | 324 | 213 | 235 | 14004 | 37807 | 1.9 | 25776 | 1170.7 | 4.1 |
| <b>Reservoirs</b> |       |       |       |       |     |     |     |       |       |     |       |        |     |
| Kariba            | KAR.2 | 0.792 |       | -1.9  | 211 | 106 | 166 | 275   | 35    | 6.5 | -100  | 1.3    | 1.2 |
| Kariba            | KAR.3 | 0.813 | 0.803 | -1.8  | 214 | 107 | 165 | 179   | 22    | 6.6 | -84   | 0.1    | 0.8 |
| Cabora Bassa      | C.B.2 | 1.132 | 1.068 | -3.0  | 305 | 165 | 172 | 151   | 24    | 6.6 | -456  | 0.5    | 3.6 |
| Cabora Bassa      | C.B.3 | 1.141 | 1.062 | -1.8  | 304 | 165 | 176 | 215   | 132   | 6.3 | -235  | 2.4    | 2.4 |
| Itezhi Tezhi      | ITT.1 | 1.276 | 1.318 | -7.1  | 434 | 272 | 206 | 2139  | 46    | 6.9 | 791   | 1.0    | 1.0 |
| Itezhi Tezhi      | ITT.2 | 1.262 | 1.292 | -6.4  | 428 | 277 | 186 | 1397  | 22    | 6.4 | 1459  | 0.3    | 3.3 |
| Itezhi Tezhi      | ITT.3 | 1.503 | 1.503 | -4.6  | 503 | 335 | 171 | 1127  | 50    | 6.3 | 1995  | 4.8    | 6.3 |
